# Supplementary material
Source: PubMed Central journal article supplement (PMC115173)
Supplement: nar_28_23_4762__1.pdf [file nar_28_23_4762__1.pdf]

## SUPPLEMENTARY MATERIAL

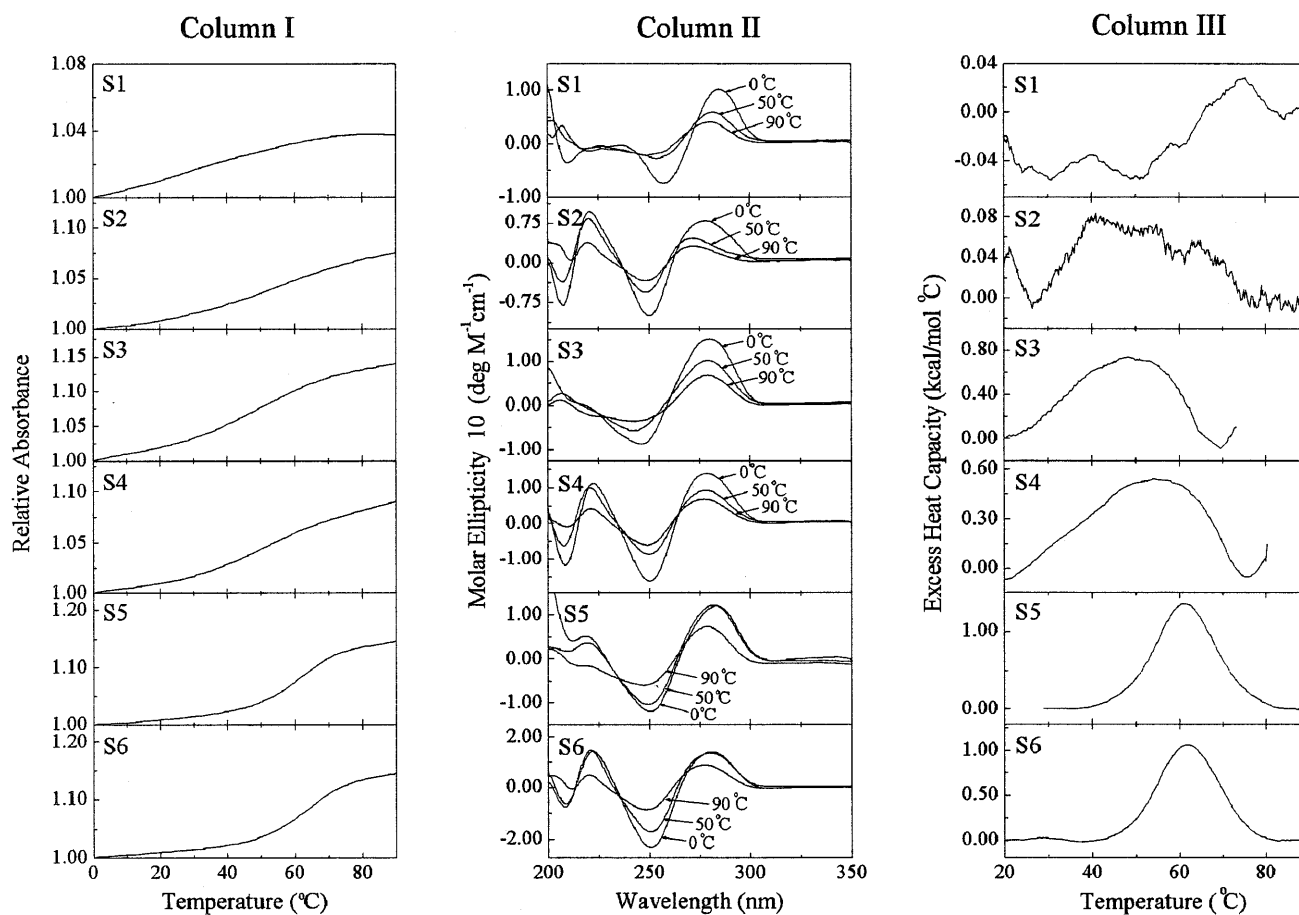

**Figure S1.** UV, CD and DSC experimental results for six ssDNAs. Columns I, II and III indicate the UV absorbance versus temperature curves at 260 nm wavelength, CD molar ellipticity versus wavelength curves, and DSC excess heat capacity versus temperature profiles, respectively.

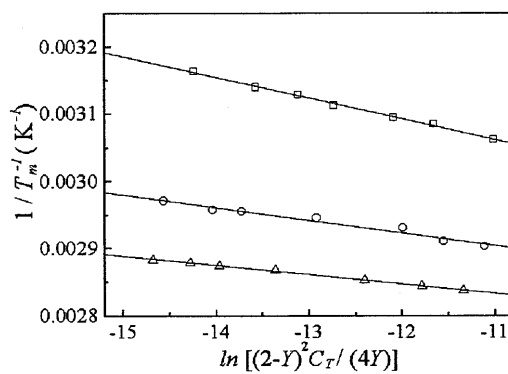

**Figure S2.** Plots of  $1/T_m$  versus  $\ln [(2-Y)^2 C_T / (4Y)]$  for three dsDNAs. The evaluations of van't Hoff enthalpy and entropy are based on equation 15 for S1S2 (squares), S3S4 (circles) and S5S6 (triangles). The thermodynamic parameters derived from these regression curves are summarized in Table 2.
